# Supplementary material
Source: HighWire-hosted journal article supplement (https://ez-admanager.com/highwire/filestream/135920/field_highwire_adjunct_files/0/french_1823.pdf)
Supplement: french_1823.pdf [file french_1823.pdf]

# 특발성 전신뇌전증의 강직간대발작에 대한 perampanel의 효과

무작위 할당 연구

## Perampanel for tonic-clonic seizures in idiopathic generalized epilepsy A randomized trial

Jacqueline A. French, MD  
 Gregory L. Krauss, MD  
 Robert T. Wechsler, MD, PhD  
 Xue-Feng Wang, MD  
 Bree DiVentura, MBA  
 Christian Brandt, MD  
 Eugen Trinka, MD, MSc  
 Terence J. O'Brien, MD, BS  
 Antonio Laurenza, MD  
 Anna Patten, PhD  
 Francesco Bibbiani, MD

**목적:** 추가적인 perampanel 복용이 특발성 전신 뇌전증(idiopathic generalized epilepsy, IGE) 환자의 약물 저항성 일차 전신강직간대발작(primary generalized tonic clonic seizure, PGTC)의 조절에 미치는 효과 및 안전성을 평가하였다.

**방법:** 본 연구는 다기관, 이중맹검 연구(ClinicalTrials.gov identifier: NCT01393743; funded by Eisai Inc.)로, 12세 이상의 PGTC를 보이는 IGE 환자들을 perampanel 군과 위약군으로 무작위 배정하여 4주간의 적정기간(perampanel을 2에서 8mg/d 혹은 최대 용량으로 증량)과 13주간의 유지기간 동안 관찰한 연구이다. 일차 평가 변수는 28일 간(적정기간 plus 유지기간 vs. 기저라인) PGTC의 빈도의 변화로 하였으며, 주요 이차 평가 변수(European Union 등록을 위한 일차 종료점)는 50% 이상 PGTC가 감소한 환자의 비율(PGTC 발작빈도에서  $\geq 50\%$ 의 감소를 보인 환자 대상; 유지기간 vs. 기저라인)을 사용하였다. 치료와 관련된 부작용도 관찰하였다.

**결과:** 총 164명의 무작위 배정 환자 중 162명의 환자가 분석되었다(위약군: 81명, perampanel군 81명). 위약에 비해 perampanel을 복용한 환자들은 28일간 PGTC의 빈도가 더 많이 감소하였으며( $-38.4\%$  vs.  $-76.5\%$ ;  $P < 0.001$ ), 50% 이상 PGTC가 감소한 환자의 비율도 높았다( $39.5\%$  vs.  $64.2\%$ ;  $P = 0.0019$ ). 유지기간 중 PGTC가 단 한 번도 없는 환자의 비율은 위약군에서 12.3%였고, perampanel군에서 30.9%였다. 안전성 분석(위약군 82; perampanel군 81)에서, perampanel군에서 가장 흔한 부작용은 어지럼증( $32.1\%$ )과 피로감( $14.8\%$ )이었다.

**결론:** 추가적인 perampanel 치료는 IGE 환자들에게 있어서 비교적 안전하게 사용 가능하였으며 약물 저항성 PGTC 발작 빈도를 감소시켰다.

**근거의 분류:** 본 연구는 약물 저항성 PGTC 발작을 가진 환자군에서 보조적으로 사용한 perampanel이 위약 치료에 비해 PGTC 발작 빈도를 감소시킨다는 Class I의 근거를 제공한다.

Neurology® 2014;83:1823–1830

Figure 2 Median percent change in PGTC seizure frequency and 50% PGTC seizure responder rates

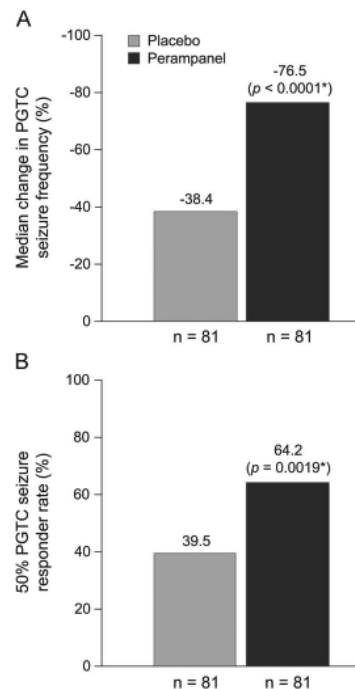

(A) Median percent change in seizure frequency per 28 days (full analysis set). (B) Fifty percent PGTC seizure responder rates (percentage of patients achieving  $\geq 50\%$  reduction in PGTC seizure frequency during maintenance vs baseline; full analysis set). \*Versus placebo. PGTC = primary generalized tonic-clonic.
